# Supplementary material for: On-site fabrication of Bi-layered adhesive mesenchymal stromal cell-dressings for the treatment of heart failure
Source: PubMed Central journal article supplement (PMC6527869; doi:10.1016/j.biomaterials.2019.04.014), 2019-07
Supplement: mmc1.pdf [file mmc1.pdf]

## **SUPPLEMENTARY INFORMATION**

### **On-site Fabrication of Bi-layered Adhesive Mesenchymal Stromal Cell-Dressings for the Treatment of Heart Failure**

- Supplementary Fig. 1. Characterization of human amnion-derived MSCs
- Supplementary Fig. 2. Optimization of the protocol to produce an MSC-dressing
- Supplementary Fig. 3. Characterization of rat amnion-derived MSCs
- Supplementary Fig. 4. Macroscopic observation of MSC-dressings on the rat heart *in vivo*.
- Supplementary Fig. 5. Characterization of rat bone marrow-derived MSCs
- Supplementary Table 1. Pre-treatment echocardiography data in the rat heart failure model.

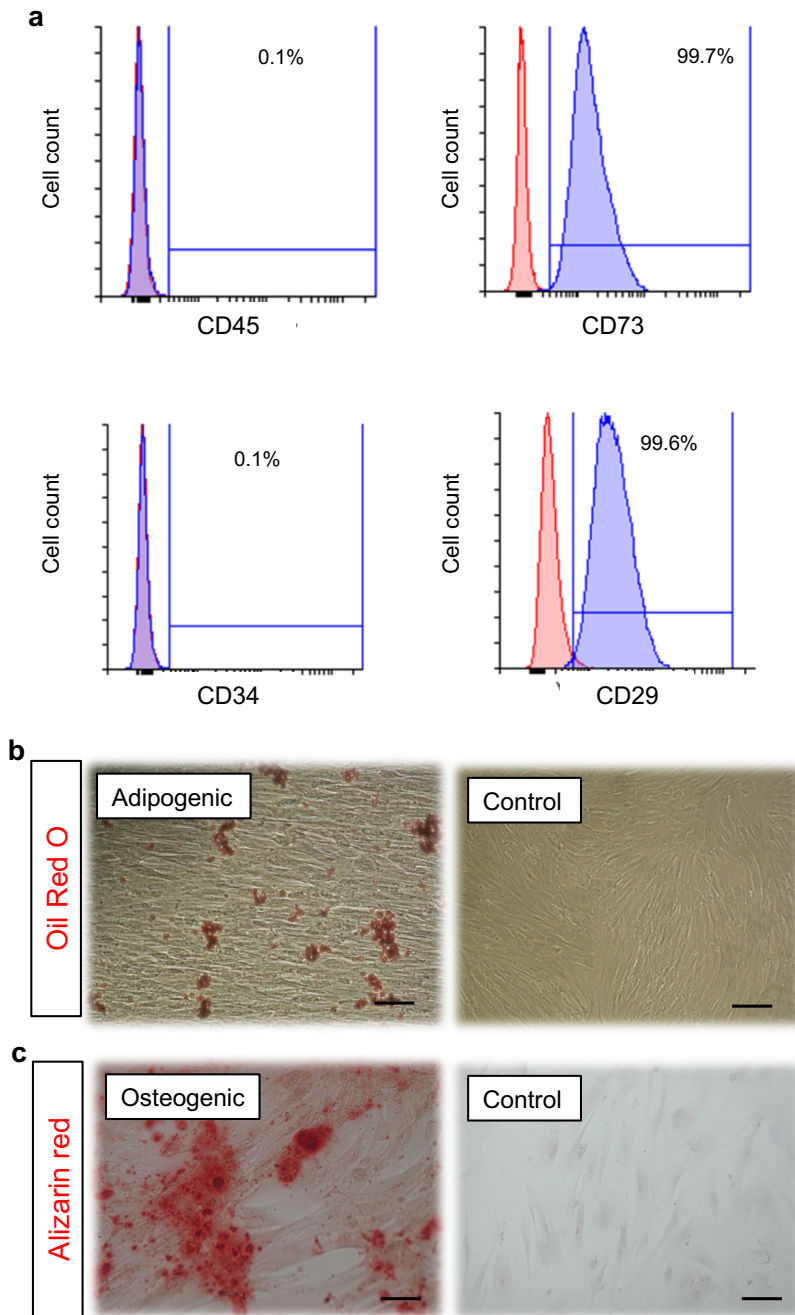

**Supplementary Fig. 1. Characterization of human amnion-derived MSCs**

(a) CD marker expression of human amnion-derived MSCs (passage 4) assessed by flow cytometric analysis. *Red*; IgG control, *Purple*; CD45/CD73/CD34/CD29 staining.

(b, c) Differentiation of human amnion-derived MSCs under adipogenic stimulation (b; Oil Red-O staining) and osteogenic stimulation (c; Alizarin red staining). *Control*; cultured in usual medium; Scale bars=50  $\mu\text{m}$  (b) and 15  $\mu\text{m}$  (c).

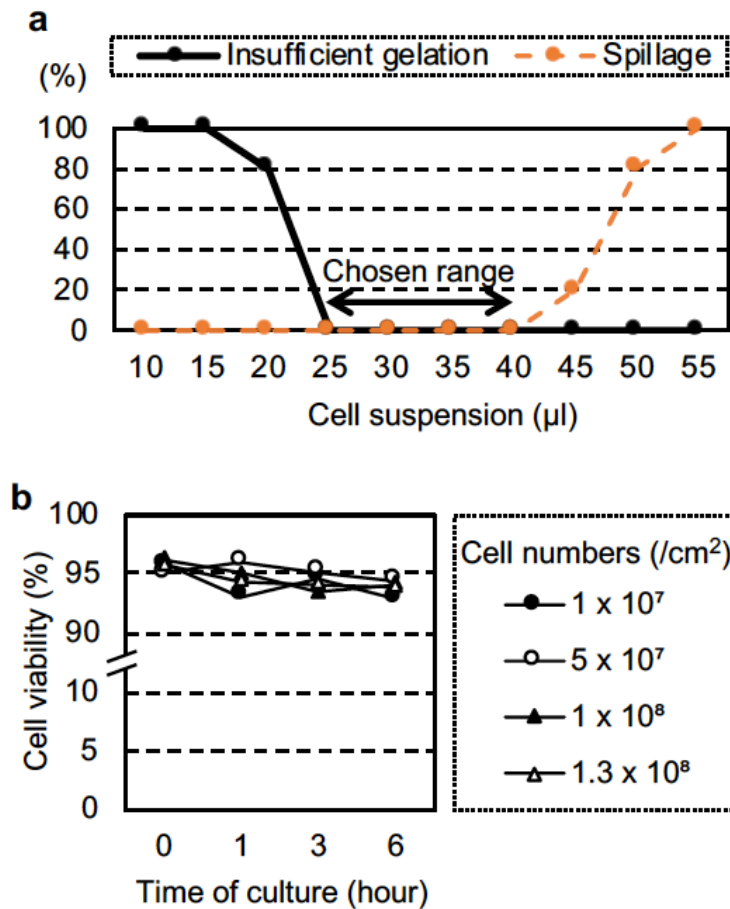

**Supplementary Fig. 2. Optimization of the protocol to produce an MSC-dressing**

**(a)** Optimization of the MSC suspension volume to produce an MSC-dressing. Human amnion-derived MSC suspension (10-55 µl) was spread onto the fibrinogen/thrombin-coated side of 1 cm<sup>2</sup> fibrin sealant film. Homogenous fibrin production and spillage of MSC-suspension when inverted were visually assessed. *n=5 samples in each condition.*

**(b)** Optimization of the MSC-density to produce an MSC-dressing. Human amnion-derived MSC suspension (30 µl including 1×10<sup>7</sup> - 1.3×10<sup>8</sup> cell/ml) were loaded onto the fibrinogen/thrombin-coated side of 1 cm<sup>2</sup> sealant film, and the viability of MSCs was assessed. *n=5 samples examined for each condition.*

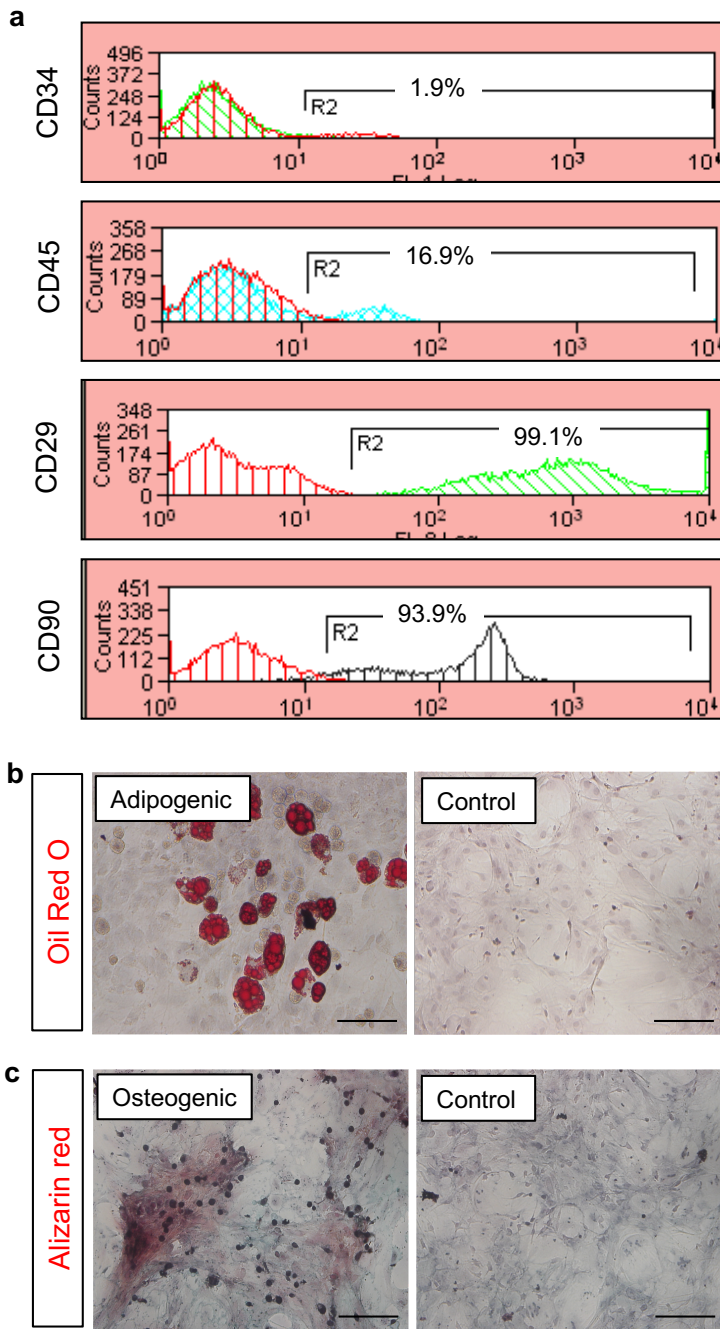

**Supplementary Fig. 3. Characterization of rat amnion-derived MSCs**

(a) CD marker expression of rat amnion-derived MSCs (passage 4) assessed by flow cytometric analysis. *Red in each panel; IgG control.*

(b, c) Differentiation of rat amnion-derived MSCs under adipogenic stimulation (b; Oil Red-O staining) and osteogenic stimulation (c; Alizarin red staining). *Control; cultured in usual medium; Scale bars=100  $\mu$ m.*



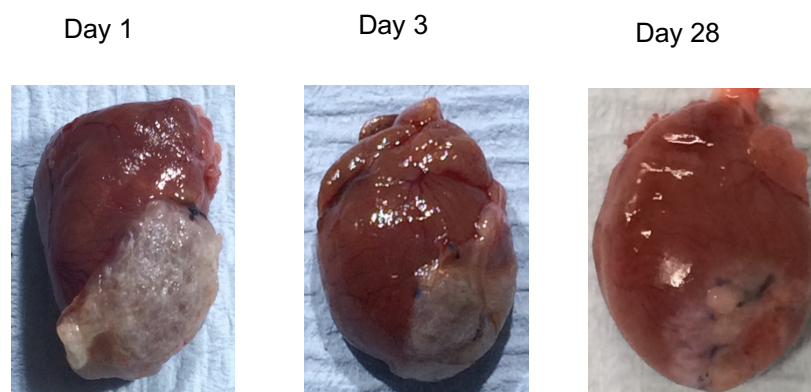

***Supplementary Fig. 4. Macroscopic observation of MSC-dressings on the rat heart in vivo***

Four weeks after left coronary artery ligation in rats, 1 cm<sup>2</sup> MSC-dressing containing 4×10<sup>6</sup> rat amnion-derived MSCs were placed onto the rat heart surface. At chosen time points after the treatment, the hearts were removed and observed macroscopically.

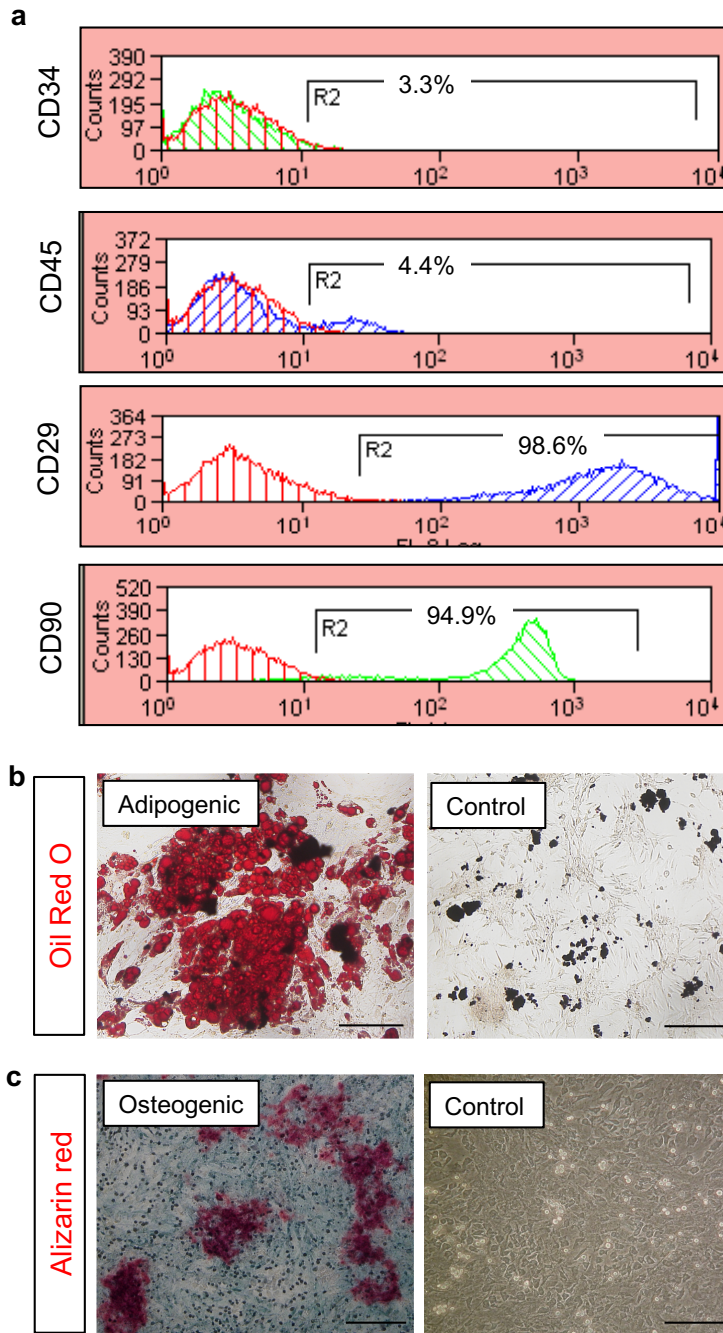

**Supplementary Fig. 5. Characterization of rat bone marrow-derived MSCs**

(a) CD marker expression of rat bone marrow-derived MSCs (passage 4 or 5) assessed by flow cytometric analysis. *Red in each panel; IgG control.*

(b, c) Differentiation of rat bone marrow-derived MSCs to adipocyte under adipogenic stimulation (b; Oil Red-O staining) and osteocytes under osteogenic stimulation (c; Alizarin red staining). *Control; cultured in usual medium; Scale bars=100  $\mu$ m.*

**Pre-treatment echocardiography data (4 weeks after MI)**

| <b>Group</b> | <b>n</b> | <b>HR (bpm)</b> | <b>LVEF (%)</b> | <b>LVESD (mm)</b> | <b>LVEDD (mm)</b> |
|--------------|----------|-----------------|-----------------|-------------------|-------------------|
| <b>Sham</b>  | 10       | 379.8±7.8       | 36.9±2.4        | 6.81±0.48         | 8.44±0.42         |
| <b>DR-0</b>  | 10       | 389.0±6.7       | 35.8±1.8        | 7.02±0.29         | 8.50±0.39         |
| <b>DR-1m</b> | 10       | 375.7±8.2       | 37.1±2.2        | 6.84±0.24         | 8.48±0.34         |
| <b>DR-2m</b> | 10       | 377.3±8.8       | 36.8±1.7        | 6.89±0.30         | 8.46±0.35         |
| <b>DR-4m</b> | 10       | 378.9±9.1       | 36.7±1.5        | 6.90±0.33         | 8.39±0.38         |
| <b>IM-4m</b> | 10       | 383.6±7.9       | 35.9±1.9        | 6.98±0.27         | 8.42±0.35         |

***Supplementary Table 1. Pre-treatment echocardiography data in the rat heart failure model***

Cardiac function of rats was measured by using echocardiography before treatment (at 4 weeks after left coronary artery ligation; post-MI ischemic cardiomyopathy model). No significant difference was detected in any indicators among any groups (One-way ANOVA). *LVEF*, left ventricular ejection fraction; *LVEDD*, left ventricular end-diastolic dimension; *LVESD*, left ventricular end-systolic dimension; *LVEDP*, left ventricular end-diastolic pressure.
